# Supplementary material for: Mapping the Oxford hip score onto the EQ-5D utility index
Source: Springer Nature journal article supplement (doi:10.1007/s11136-012-0174-y), 2012-04-21
Supplement: MOESM2 [file 276906]

**Table W1 (online)**
Coefficients for Response mapping model by EQ-5D dimension and response level†

| **OHS question: response level** | **Mobility** | | **Self-care** | | **Usual Activities** | | **Pain / Discomfort** | | **Anxiety / Depression** | |
| --- | --- | --- | --- | --- | --- | --- | --- | --- | --- | --- |
| **1** | **3** | **2** | **3** | **1** | **3** | **1** | **3** | **2** | **3** |
| Description of pain: 0 | Base case | | Base case | | Base case | | Base case | | Base case | |
| Description of pain: 1 | 0.270 | -12.538 * | 0.069 | 0.684 | 0.228 | 0.022 | -1.345 * | -2.340 * | -0.085 | -0.229 |
| Description of pain: 2 | 0.239 | 17.937 * | 0.495 * | 0.505 | 0.009 | 0.028 | -0.793 * | -3.260 * | 0.089 | 0.680 |
| Description of pain: 3 | 0.506 | 6.363 | 1.047 * | -15.188 * | -0.186 | -0.387 | 0.197 | -3.440 * | 0.178 | -0.629 |
| Description of pain: 4 | 0.406 | 10.411 | 1.086 * | 1.337 | 0.034 | -0.236 | 1.561 * | -1.837 * | -0.071 | 0.223 |
|  |  |  |  |  |  |  |  |  |  |  |
| Night pain: 0 | Base case | | Base case | | Base case | | Base case | | Base case | |
| Night pain: 1 | 0.258 | 0.327 | -0.145 | -0.382 | 0.244 | 0.198 | -0.051 | -0.320 | 0.029 | -0.311 |
| Night pain: 2 | -0.206 | -26.334 * | 0.108 | -1.002 | 0.185 | -0.149 | -0.182 | -0.627 * | 0.224 | 0.009 |
| Night pain: 3 | 0.034 | -13.243 * | 0.305 | -15.313 * | 0.684 * | 0.520 | -0.161 | -1.508 * | 0.170 | 0.464 |
| Night pain: 4 | -0.120 | -13.476 * | 0.216 | 0.674 | 0.560 | 0.560 | 0.533 | -0.645 * | -0.242 | -0.235 |
|  |  |  |  |  |  |  |  |  |  |  |
| Sudden pain: 0 | Base case | | Base case | | Base case | | Base case | | Base case | |
| Sudden pain: 1 | -0.957 * | -0.789 | 0.488 * | 0.914 | -0.003 | -0.097 | -0.234 | -0.259 | -0.124 | -0.143 |
| Sudden pain: 2 | -0.539 | -14.095 * | 0.182 | -0.360 | -0.232 | -0.009 | -0.458 | -0.622 * | 0.129 | -0.061 |
| Sudden pain: 3 | -0.742 * | -4.900 | 0.325 | 0.875 | -0.673 | -1.205 * | 0.124 | -0.327 | -0.030 | -1.749 * |
| Sudden pain: 4 | -0.716 * | -29.959 * | 0.158 | -0.366 | -0.374 | -0.038 | 0.422 | -0.597 * | -0.180 | -0.728 |
|  |  |  |  |  |  |  |  |  |  |  |
| Limping: 0 | Base case | | Base case | | Base case | | Base case | | Base case | |
| Limping: 1 | 0.516 * | 2.308 | -0.075 | -0.149 | 0.198 | -0.212 | 0.304 | -0.533 * | -0.055 | 0.214 |
| Limping: 2 | 0.651 * | 16.388 * | 0.013 | 0.072 | 0.104 | -0.544 | 0.364 | -0.610 | -0.145 | -0.218 |
| Limping: 3 | 1.026 * | 10.119 * | -0.099 | -2.124 | 0.534 * | -0.336 | 0.567 * | -0.373 | 0.132 | -0.156 |
| Limping: 4 | 1.538 * | 32.265 * | -0.004 | -0.460 | 0.710 * | 0.129 | 0.637 * | -0.009 | -0.415 | -0.162 |
|  |  |  |  |  |  |  |  |  |  |  |
| Walking duration: 0 | Base case | | Base case | | Base case | | Base case | | Base case | |
| Walking duration: 1 | -0.750 | 0.442 | -0.126 | 0.931 | -0.150 | 0.299 | 0.090 | -0.527 * | 0.344 | 0.560 |
| Walking duration: 2 | -0.662 * | -13.361 * | 0.013 | -0.285 | -0.232 | 0.219 | 0.092 | -0.416 * | 0.419 * | 0.467 |
| Walking duration: 3 | -0.136 | -1.323 | -0.340 | -0.066 | -0.051 | -0.468 | 0.018 | -0.548 * | 0.123 | 0.276 |
| Walking duration: 4 | 0.365 | 17.524 * | -0.095 | -0.786 | 0.042 | -0.199 | 0.339 | -0.822 * | 0.061 | 0.339 |
|  |  |  |  |  |  |  |  |  |  |  |
| Climbing stairs: 0 | Base case | | Base case | | Base case | | Base case | | Base case | |
| Climbing stairs: 1 | -0.672 | -0.926 | 0.233 | 0.403 | -0.762 | -0.390 | -0.198 | 0.175 | 0.204 | -0.123 |
| Climbing stairs: 2 | -0.373 | -17.256 * | 0.229 | -0.964 | -0.488 | -0.690 * | -0.616 | -0.161 | 0.051 | -0.792 * |
| Climbing stairs: 3 | 0.380 | -11.117 | -0.058 | -1.480 | -0.003 | -0.505 | -0.824 | -0.688 | -0.111 | -1.233 * |
| Climbing stairs: 4 | 0.819 * | -10.422 * | -0.248 | -1.547 | 0.398 | -0.677 | -0.488 | -0.588 | -0.328 | -1.123 |
|  |  |  |  |  |  |  |  |  |  |  |
| Socks and stockings: 0 | Base case | | Base case | | Base case | | Base case | | Base case | |
| Socks and stockings: 1 | 0.393 | -1.460 | -0.350 | -1.374 * | 0.082 | -0.452 * | 0.133 | -0.327 | -0.365 * | -0.130 |
| Socks and stockings: 2 | 0.035 | -28.254 * | -0.928 * | -1.029 | -0.009 | -0.376 | -0.171 | -0.331 | -0.169 | -0.032 |
| Socks and stockings: 3 | 0.261 | -2.077 | -1.628 * | -2.364 * | 0.047 | -0.305 | -0.042 | -0.184 | -0.033 | 0.188 |
| Socks and stockings: 4 | 0.735 * | 7.397 | -2.580 * | -1.118 | 0.256 | -0.395 | 0.302 | -0.776 | -0.418 | 0.365 |
|  |  |  |  |  |  |  |  |  |  |  |
| Pain from standing up from chair: 0 | Base case | | Base case | | Base case | | Base case | | Base case | |
| Pain from standing up from chair: 1 | 0.718 | -2.117 | -0.462 | -1.770 * | 0.780 | -0.400 | -0.721 | -0.562 | -0.407 | -0.856 * |
| Pain from standing up from chair: 2 | 0.445 | -14.710 * | -0.341 | 0.553 | 0.788 | -0.367 | -0.817 | -1.111 * | -0.497 | -0.597 |
| Pain from standing up from chair: 3 | 0.494 | -16.799 * | -0.409 | 0.931 | 0.496 | -0.616 | -0.754 | -1.445 * | -0.537 | -1.324 * |
| Pain from standing up from chair: 4 | 0.400 | -32.046 * | -0.329 | 1.235 | 0.305 | -0.443 | -0.269 | -0.887 | -0.494 | -1.629 * |
|  |  |  |  |  |  |  |  |  |  |  |
| Car and public transport: 0 | Base case | | Base case | | Base case | | Base case | | Base case | |
| Car and public transport: 1 | 0.152 | 1.356 | -0.135 | -0.339 | -0.768 | 0.095 | -1.893 | 0.104 | 0.096 | -0.289 |
| Car and public transport: 2 | -0.209 | -13.786 * | -0.204 | -1.925 * | -1.223 | 0.113 | -1.579 | -0.100 | -0.021 | -0.683 |
| Car and public transport: 3 | 0.101 | -23.704 * | -0.454 | -3.295 | -0.657 | -0.754 | -1.963 * | 0.280 | -0.255 | -0.293 |
| Car and public transport: 4 | 0.327 | -18.237 * | -0.475 | -2.200 | -0.146 | -0.018 | -1.783 | 0.725 | -0.170 | 0.137 |
|  |  |  |  |  |  |  |  |  |  |  |
| Washing and drying: 0 | Base case | | Base case | | Base case | | Base case | | Base case | |
| Washing and drying: 1 | -1.340 * | 0.904 | 1.034 * | -1.894 * | -0.543 | 0.504 | -0.121 | 0.353 | -0.040 | 0.154 |
| Washing and drying: 2 | -0.988 | -28.771 * | -0.150 | -3.159 * | -0.174 | 0.098 | -0.269 | 0.421 | -0.039 | 0.065 |
| Washing and drying: 3 | -1.000 | -12.552 * | -1.161 * | -4.903 * | 0.012 | 0.157 | -0.019 | 0.498 | -0.232 | -0.598 |
| Washing and drying: 4 | -1.079 | -13.849 * | -2.183 * | -2.858 * | 0.299 | 0.028 | 0.020 | 0.350 | -0.216 | 0.180 |
|  |  |  |  |  |  |  |  |  |  |  |
| House shopping: 0 | Base case | | Base case | | Base case | | Base case | | Base case | |
| House shopping: 1 | 0.255 | -32.816 * | -0.090 | -0.433 | 0.005 | -0.634 * | 0.497 | 0.558 * | -0.221 | -0.303 |
| House shopping: 2 | 0.443 | -12.410 * | -0.304 * | -1.662 | -0.199 | -1.030 * | 0.137 | 0.139 | -0.262 | -0.441 |
| House shopping: 3 | 0.840 * | 1.661 | -0.652 * | -0.897 | 0.026 | -0.913 * | 0.419 | 0.005 | -0.752 * | -0.774 |
| House shopping: 4 | 1.659 * | -16.399 * | -1.031 * | -3.012 * | 0.888 * | -1.109 * | 0.594 * | -0.153 | -1.025 * | -1.123 * |
|  |  |  |  |  |  |  |  |  |  |  |
| Pain interfering work: 0 | Base case | | Base case | | Base case | | Base case | | Base case | |
| Pain interfering work: 1 | -0.369 | 0.363 | -0.280 | -1.262 | -0.157 | -1.401 * | 0.455 | -0.476 * | 0.172 | -0.361 |
| Pain interfering work: 2 | 0.450 | 11.253 * | -0.206 | -1.594 | -0.282 | -2.270 * | -0.070 | -1.153 * | -0.206 | -0.796 |
| Pain interfering work: 3 | 0.807 | -4.422 | -0.295 | 0.956 | 0.865 | -2.383 * | 0.617 | -1.392 * | -0.326 | -1.192 |
| Pain interfering work: 4 | 1.312 * | -0.642 | -0.717 * | -0.148 | 2.174 * | -1.717 * | 1.365 * | -0.455 | -0.631 * | -2.172 * |
|  |  |  |  |  |  |  |  |  |  |  |
| Constant | -3.041 * | -2.543 | 2.470 * | 2.995 * | -2.602 * | 1.637 * | -0.213 | 3.175 * | 0.769 | 0.485 |

† Of the three response levels for each EQ-5D dimension (one, two or three), one was automatically removed by Stata to become the base level; coefficients are given for the remaining two with respect to the base case.

* Statistically significant at 0.05 level
